# Supplementary material for: VLP-ELISA for the Detection of IgG Antibodies against Spike, Envelope, and Membrane Antigens of SARS-CoV-2 in Indian Population
Source: MDPI journal article supplement (doi:10.3390/vaccines11040743), 2023-03-27
Supplement: s1 [file s1]

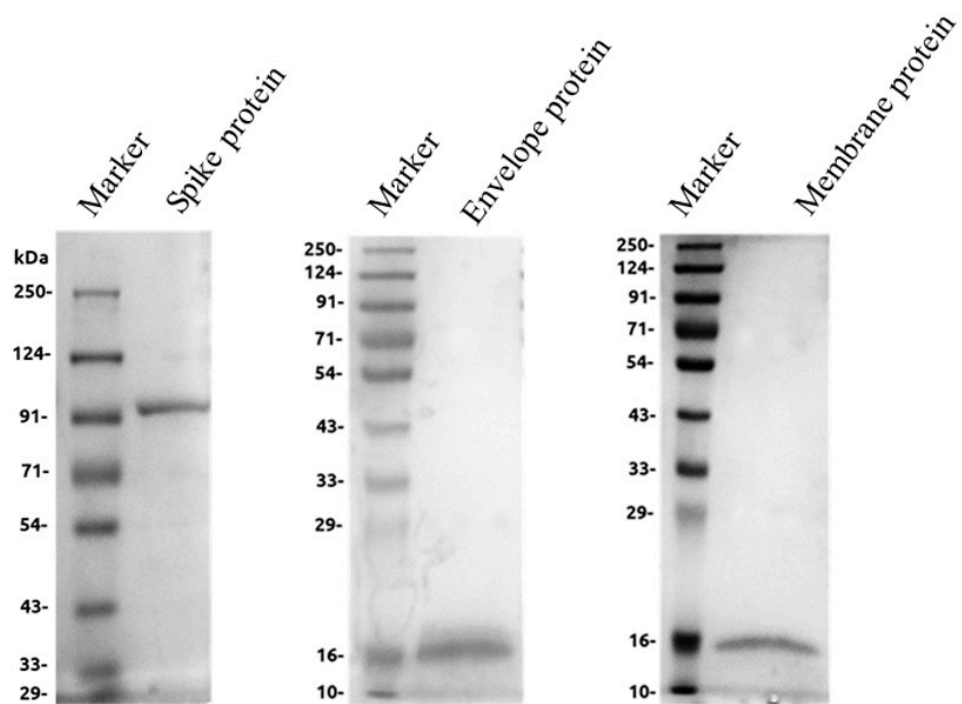

**Figure S1.** SDS-PAGE analysis of spike (S), envelope (E) and membrane (M) protein. ImageJ demonstrated that densitometric readings/intensity ratios for S, E, and M proteins were 1, 1.01, and 1, respectively.
